# Supplementary material for: Fabrication of magnetic Fe3O4@P(DVB-co-MAA) microspheres using hollow microspheres as templates for protein separation
Source: Royal Society of Chemistry journal article supplement (doi:10.1039/d3nj00069a), 2023-01-01
Supplement: d3nj00069a1.pdf [file d3nj00069a1.pdf]

## **Fabrication of magnetic Fe<sub>3</sub>O<sub>4</sub>@P(DVB-co-MAA) microspheres using hollow microspheres as templates for protein separation**

Fengjie Bu<sup>a</sup>, Qianrui Xu<sup>a</sup>, Wenjie Jiang<sup>a</sup>, Yingying Wei<sup>a</sup>, Zhifei Wang<sup>a</sup>, Yong Jiang<sup>\*a</sup>

<sup>a</sup> Jiangsu Province Hi-Tech Key Laboratory for Biomedical Research, School of Chemistry and Chemical Engineering, Southeast University, China

\*Corresponding authors: Yong Jiang, Email address: [yj@seu.edu.cn](mailto:yj@seu.edu.cn)

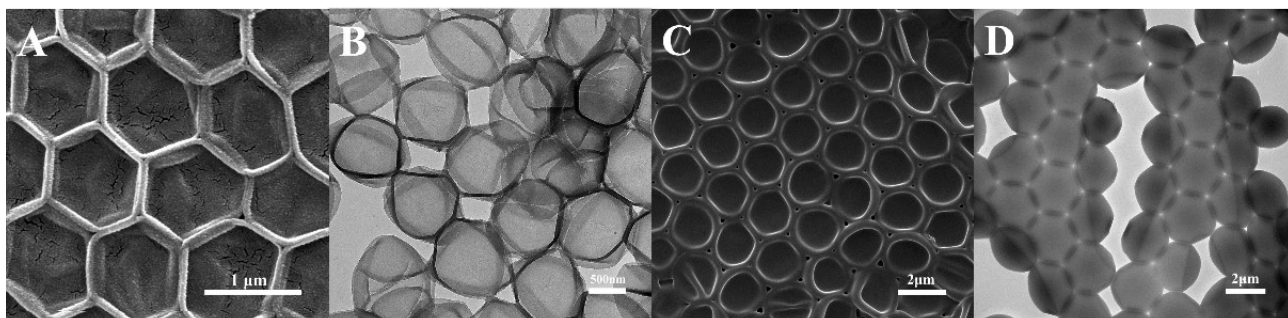

**Fig. S1.** (A and B) SEM images and TEM images of DVB cross-linked hollow P (DVB-co-MAA) microspheres; (C and D) SEM images and TEM images of MBA cross-linked hollow P (MBA-co-MAA) microspheres.

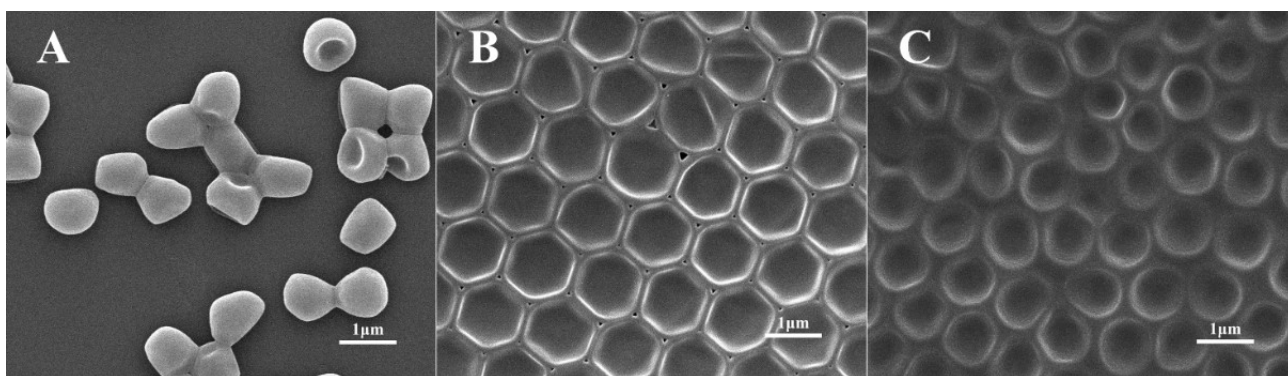

**Fig. S2.** (A) SEM images of P(DVB-co-MAA) hollow microspheres (B) P(HEMA-DVB-MAA) (HEMA:MAA=1:1) hollow microspheres, (C) P(HEMA-DVB-MAA) (HEMA:MAA=6:1) hollow microspheres.

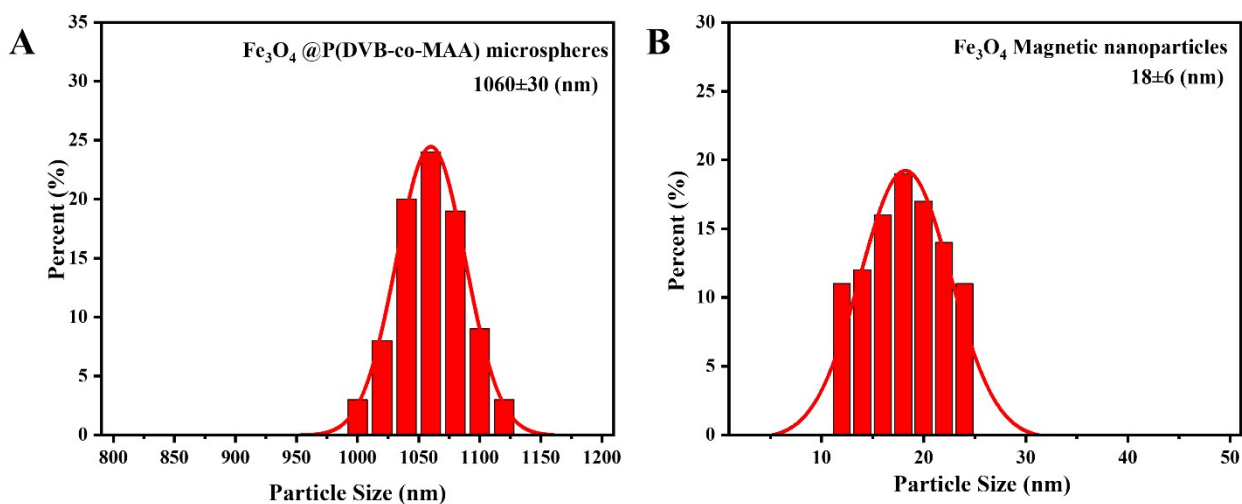

**Fig. S3** (A) Particle size distribution of  $\text{Fe}_3\text{O}_4@P(\text{DVB-co-MAA})$  microspheres; (B) Particle size distribution of  $\text{Fe}_3\text{O}_4$  magnetic nanoparticles.

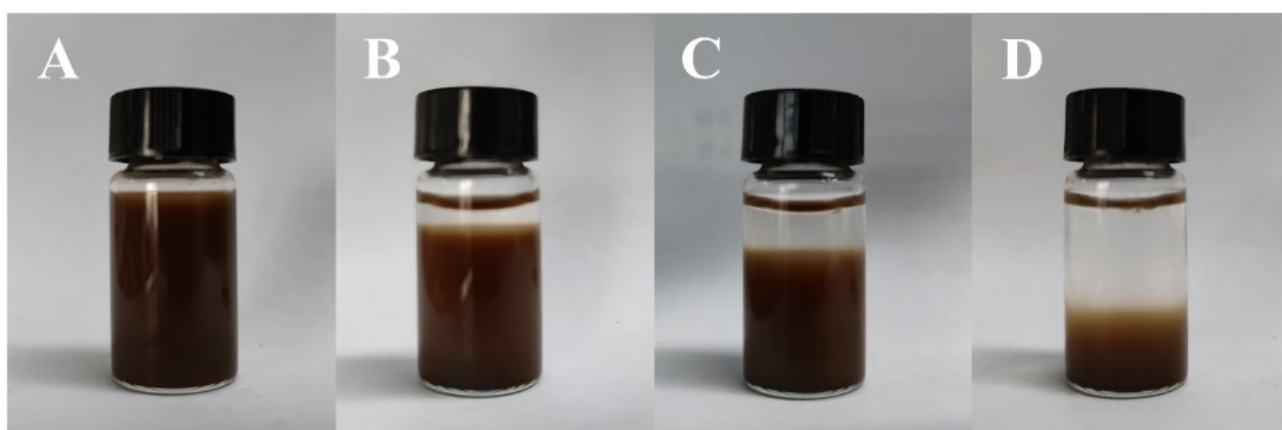

**Fig. S4.** (A-D) The photos of  $\text{Fe}_3\text{O}_4@P(\text{DVB-co-MAA})$  microspheres suspended in water, after standing for 0h, 4h, 8h, and 12h, respectively.

**Table 1.** Carboxyl content and zeta potential of  $\text{Fe}_3\text{O}_4@P(\text{DVB-co-MAA})$  microspheres,  $\text{Fe}_3\text{O}_4@P(\text{HEMA-DVB-MAA})(\text{HEMA:MAA}=1:1)$  microspheres and  $\text{Fe}_3\text{O}_4@P(\text{HEMA-DVB-MAA})(\text{HEMA:MAA}=6:1)$  microspheres

| Microsphere               | 1      | 2      | 3      |
|---------------------------|--------|--------|--------|
| Carboxyl content (mmol/g) | 0.9005 | 0.4565 | 0.3412 |
| Zeta potential (mv)       | -47.87 | -26.55 | -13.32 |

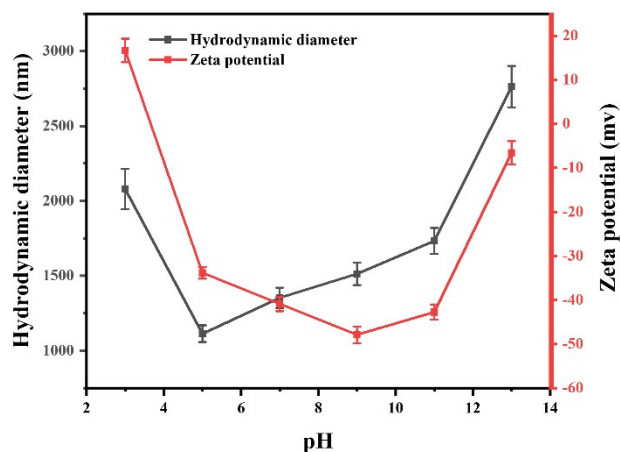

**Fig. S5.** The hydrodynamic diameter and zeta potential of  $\text{Fe}_3\text{O}_4@\text{P}(\text{DVB-co-MAA})$  microspheres. The test was repeated three times.

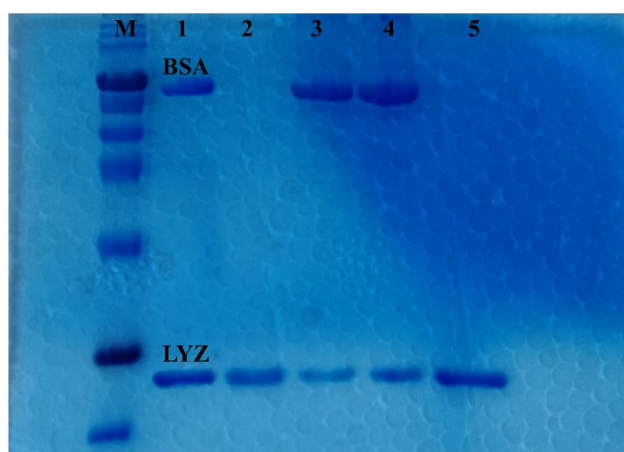

**Fig. S6.** SDS-PAGE analysis of magnetic  $\text{Fe}_3\text{O}_4@\text{P}(\text{DVB-co-MAA})$  microspheres' protein separation. (Separation results of BSA and LYZ solutions. Lane M: protein molecular weight marker; lane 1: original solution before separation; lanes 2 and 3: supernatant and eluted protein after separation at  $\text{pH} = 4.7$ , respectively. Lanes 4 and 5: supernatant and eluted protein after separation at  $\text{pH} = 9$ , respectively.)

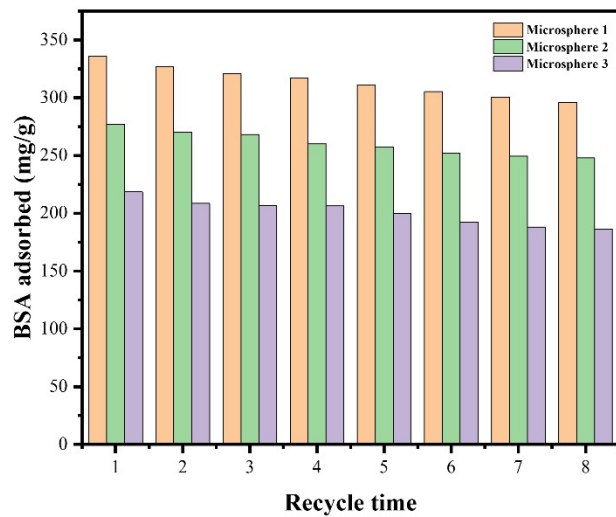

**Fig. S7.** Reuse of Microsphere 1 ( $\text{Fe}_3\text{O}_4@\text{P}(\text{DVB-co-MAA})$ ), Microsphere 2 ( $\text{Fe}_3\text{O}_4@\text{P}(\text{HEMA-DVB-MAA})$  (HEMA : MAA=1:1)), and Microsphere 3 ( $\text{Fe}_3\text{O}_4@\text{P}(\text{HEMA-DVB-MAA})$  (HEMA : MAA=6:1)).
